# Supplementary material
Source: MDPI journal article supplement (https://www.mdpi.com/2077-1312/8/11/925)
Supplement: s1 [file s1]

## Supplementary Material

### Starvation-dependent inhibition of the hydrocarbon degrader *Marinobacter* sp. TT1 by a chemical dispersant

Saskia Rughöft <sup>1</sup>, Anjela L. Vogel <sup>1</sup>, Samantha B. Joye <sup>2</sup>, Tony Gutierrez <sup>3</sup>, and Sara Kleindienst <sup>1,\*</sup>

<sup>1</sup> Microbial Ecology, Center for Applied Geosciences, University of Tübingen, Germany

<sup>2</sup> Department of Marine Sciences, University of Georgia, Athens GA, USA 30602-3636

<sup>3</sup> Institute of Mechanical, Process and Energy Engineering, School of Engineering and Physical Sciences, Heriot-Watt University, Edinburgh, EH14 4AS, United Kingdom

• Correspondence: [sara.kleindienst@uni-tuebingen.de](mailto:sara.kleindienst@uni-tuebingen.de)

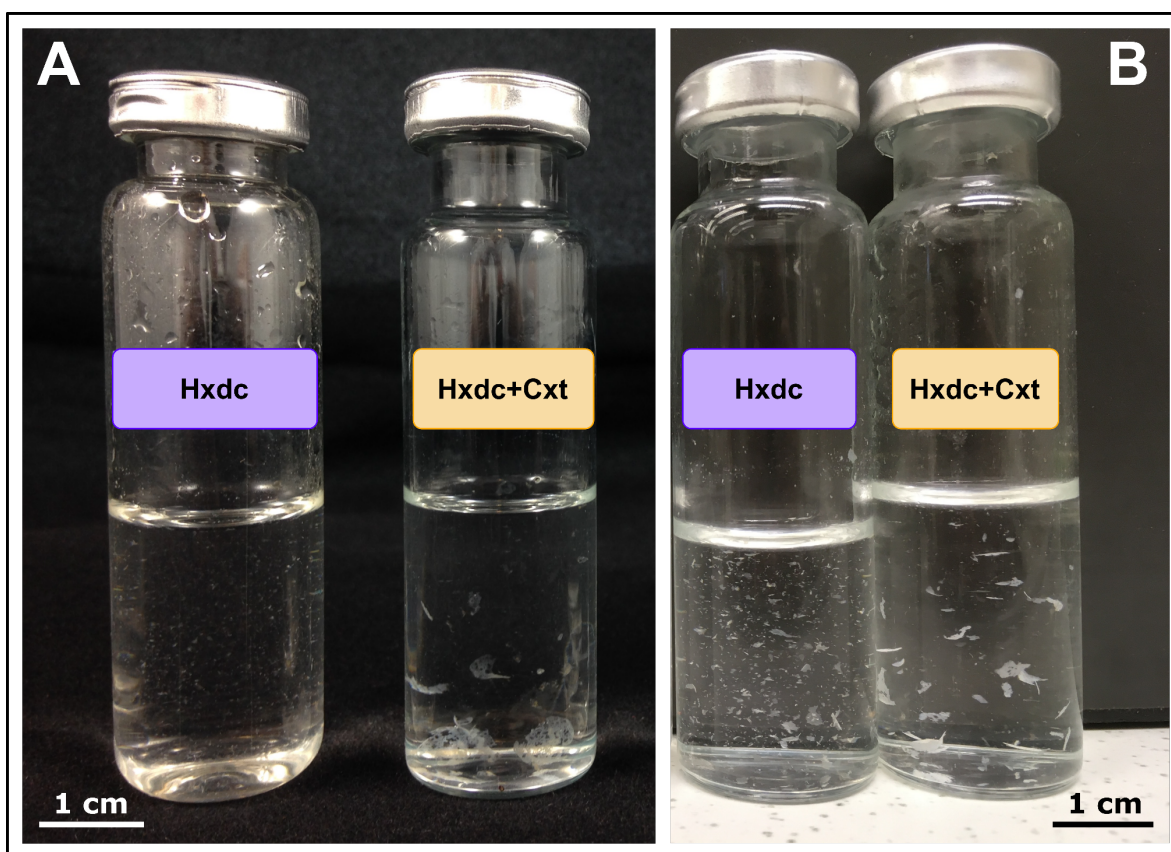

**Figure S1:** Aggregate morphology in *Marinobacter* sp. TT1 cultures after five days of incubation. Treatments contained the following carbon sources: 100 mg l<sup>-1</sup> *n*-hexadecane (Hxdc) or both 100 mg l<sup>-1</sup> *n*-hexadecane and 10 mg l<sup>-1</sup> Corexit (Hxdc+Cxt). **A)** Starved cultures. **B)** Well-fed cultures.
